# Supplementary material for: Antibacterial, antioxidant and injectable hydrogels constructed using CuS and curcumin co-loaded micelles for NIR-enhanced infected wound healing
Source: Royal Society of Chemistry journal article supplement (doi:10.1039/d3tb02278a), 2023-01-01
Supplement: d3tb02278a1.pdf [file d3tb02278a1.pdf]

## Electronic Supplementary Information

# Antibacterial, antioxidant and injectable hydrogels constructed using CuS and curcumin co-loaded micelles for NIR-enhanced infected wound healing

Pengpeng Jia,<sup>a,b</sup> Yu Zou<sup>\*a,b</sup> and Jiang Jiang<sup>\*a,b</sup>

<sup>a</sup>School of Nano-Tech and Nano-Bionics, University of Science and Technology of China, Hefei 230026, China

<sup>b</sup>i-Lab, CAS Key Laboratory of Nano-Bio Interface, Suzhou Institute of Nano-Tech and Nano-Bionics, Chinese Academy of Sciences, Suzhou 215123, China

**Fig. S1** (a) The TEM image and (b) X-ray diffraction pattern of the hydrophobic CuS

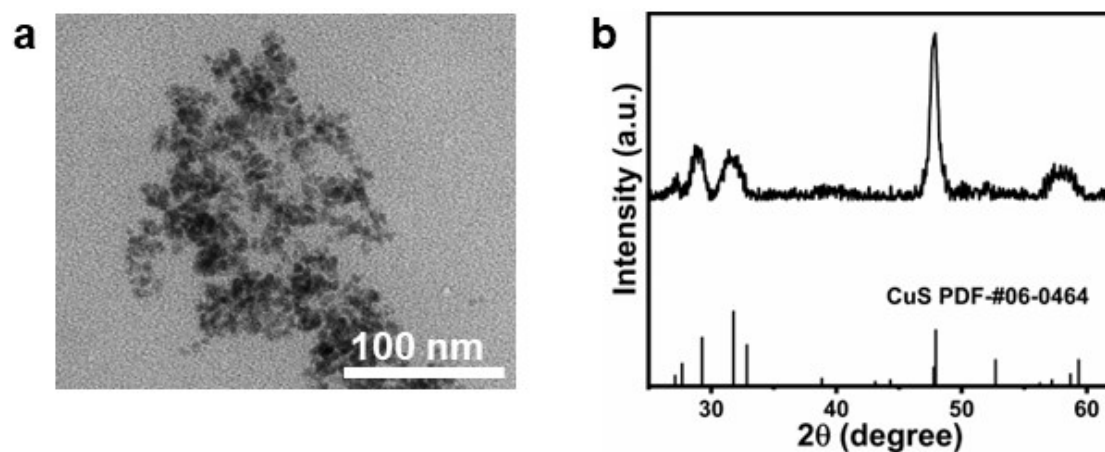

NPs.

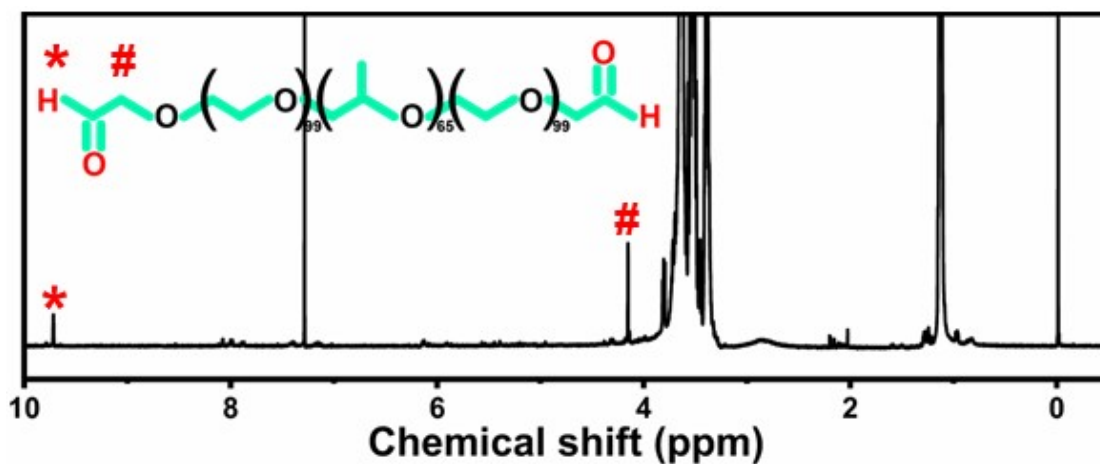

Fig. S2 The <sup>1</sup>H NMR spectrum of the aldehyde-terminated F127.

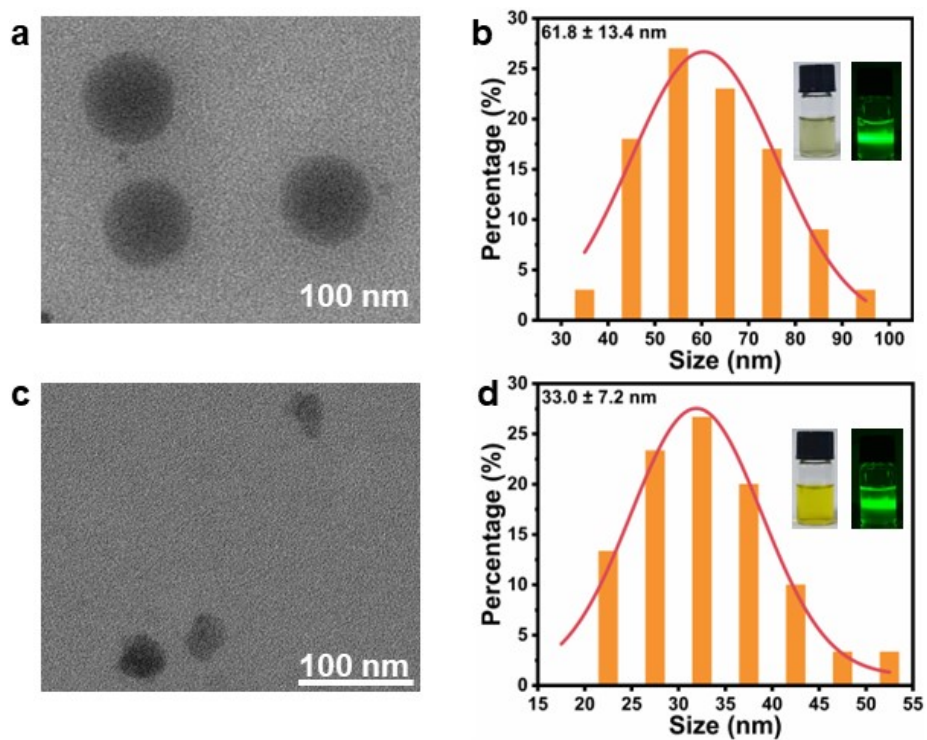

Fig. S3 (a) The TEM image and (b) particle size distribution of F127-CHO@CuS micelles; (c) the TEM image and (d) particle size distribution of F127-CHO@cur

micelles. Inset: photograph of the corresponding micelles aqueous solution and the Tyndall effect.

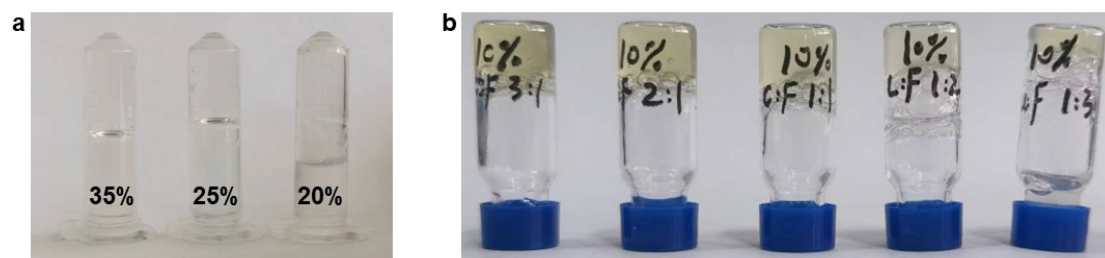

**Fig. S4** (a) The photographs of F127-CHO with different concentration, showing spontaneous gel formation with concentration over 25%; (b) the gelation phenomena after mixing carboxymethyl chitosan with F127-CHO at different volume ratios (left to right: 3:1, 2:1, 1:1, 1:2, 1:3).

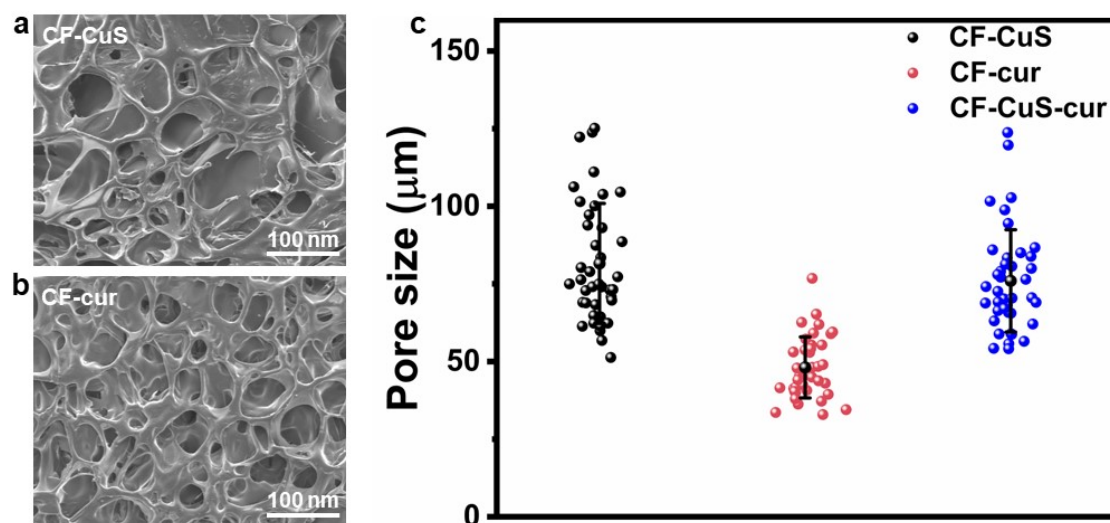

**Fig. S5** The SEM images of (a) CF-CuS hydrogel, (b) CF-cur hydrogel, and (c) the corresponding hydrogel pore size analysis.

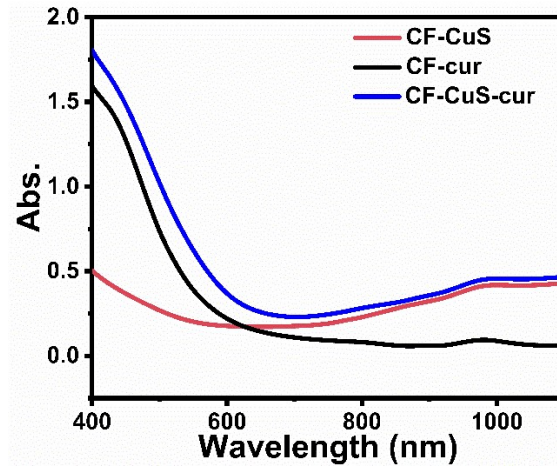

**Fig. S6** The respective UV-vis-NIR spectra of CF-CuS, CF-cur, and CF-CuS-cur hydrogels.

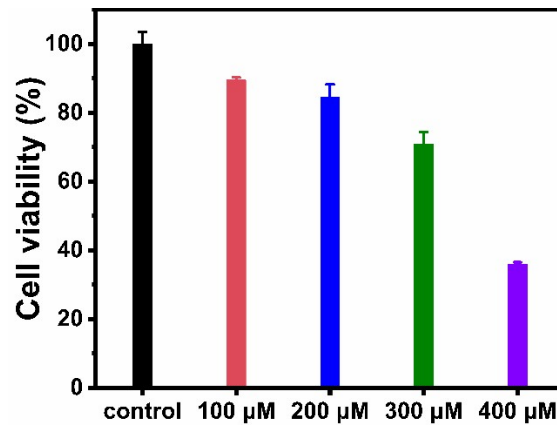

**Fig. S7** The cell viability of HUVECs that were cultured with different concentrations of H<sub>2</sub>O<sub>2</sub>.

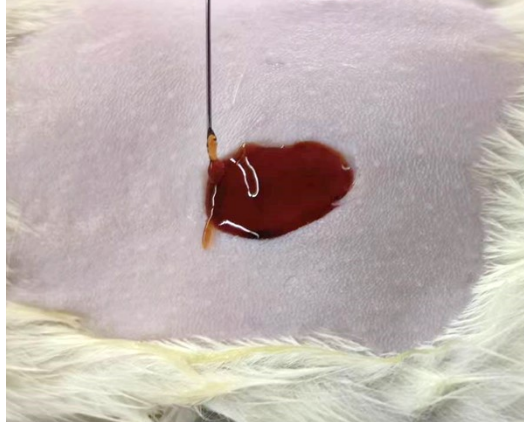

**Fig. S8** The application of CF-CuS-cur hydrogel on infected wound by injection.
